# Supplementary material
Source: PubMed Central journal article supplement (PMC2689795)
Supplement: en.2008-1690_2.pdf [file en.2008-1690_2.pdf]

**Table SI.** TSHR antibodies and serum T4 in BALB/c mice that are Aire +/+, +/- or -/- that were depleted of regulatory T cells using anti-CD25 or anti-CD122 before each of three immunizations with A-subunit-Ad. Sera were tested after 2 or 3 immunizations (2x and 3x, respectively). TSHR antibodies were measured by TSH binding inhibition (TBI). The number of mice studied in each group is given in parentheses after the mean  $\pm$  SEM for TBI (% inhibition) or T4 (ug/dL). No statistically significant differences in TBI or T4 were observed between values for mice treated with anti-CD25 or anti-CD122.

|            | 2x                 |                     | 3x                 |                    |
|------------|--------------------|---------------------|--------------------|--------------------|
| <b>TBI</b> | anti-CD25          | anti-CD122          | anti-CD25          | anti-CD122         |
| Aire +/+   | 72.9 $\pm$ 6.0 (6) | 67.1 $\pm$ 4.8 (8)  | 77.2 $\pm$ 5.1 (5) | 82.5 $\pm$ 1.9 (8) |
| Aire +/-   | 74.6 $\pm$ 6.1 (7) | 68.9 $\pm$ 3.8 (10) | 70.3 $\pm$ 9.0 (8) | 76.7 $\pm$ 4.8 (8) |
| Aire -/-   | 76.5 $\pm$ 4.4 (6) | 71.1 $\pm$ 9.9 (5)  | 65.5 $\pm$ 6.4 (6) | 76.7 $\pm$ 3.5 (4) |
|            |                    |                     |                    |                    |
| <b>T4</b>  | anti-CD25          | anti-CD122          | anti-CD25          | anti-CD122         |
| Aire +/+   | 9.5 $\pm$ 1.4 (6)  | 10.7 $\pm$ 1.5 (8)  | 11.9 $\pm$ 1.8 (5) | 11.3 $\pm$ 1.3 (8) |
| Aire +/-   | 8.3 $\pm$ 1.1 (8)  | 9.8 $\pm$ 1.3 (10)  | 10.5 $\pm$ 1.5 (8) | 7.8 $\pm$ 1.4 (10) |
| Aire -/-   | 8.9 $\pm$ 1.7 (6)  | 13.4 $\pm$ 1.9 (5)  | 8.9 $\pm$ 1.7 (6)  | 11.1 $\pm$ 3.3 (5) |
