# Supplementary material
Source: PubMed Central journal article supplement (PMC2689795)

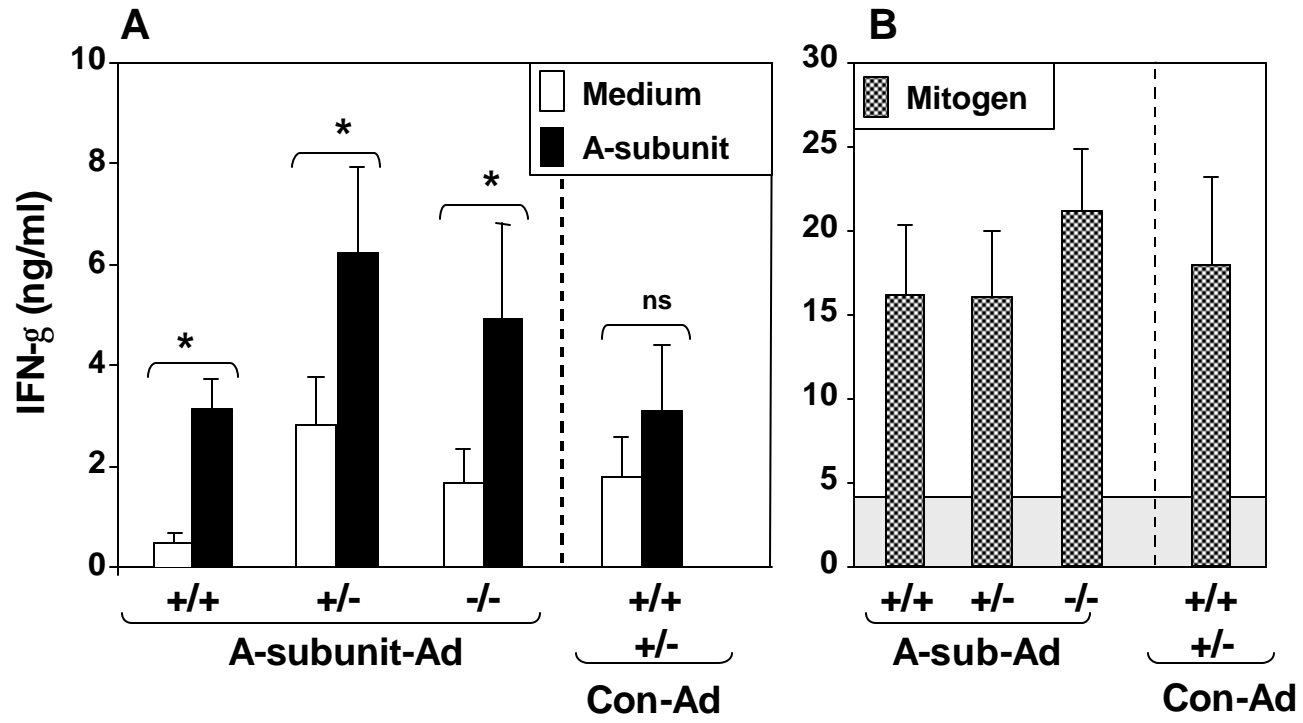

Figure S1

Supplement: en.2008-1690_3.pdf [file en.2008-1690_3.pdf]

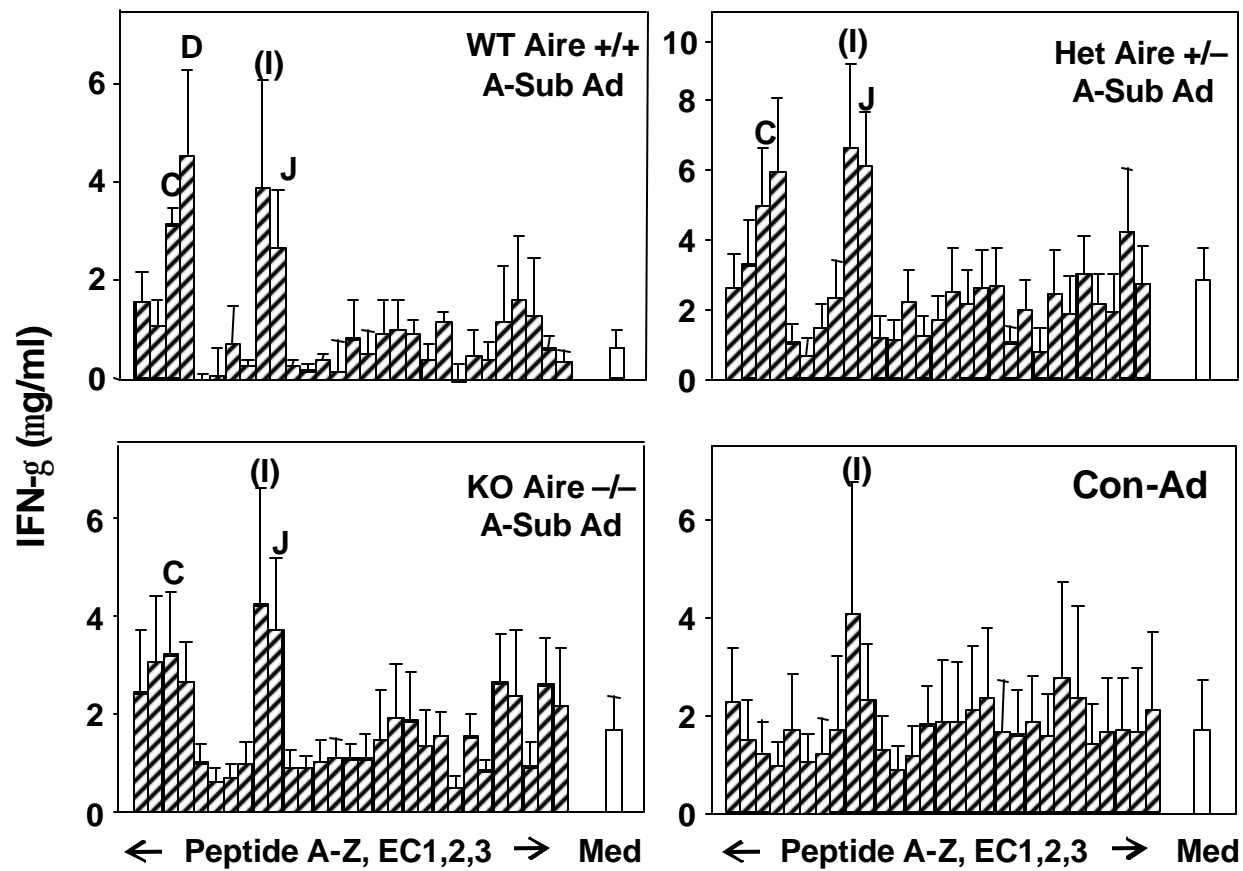

Figure S2

Supplement: en.2008-1690_4.pdf [file en.2008-1690_4.pdf]
